# Supplementary material for: Activity of Antibiotics and Potential Antibiofilm Agents against Biofilm-Producing Mycobacterium avium-intracellulare Complex Causing Chronic Pulmonary Infections
Source: MDPI journal article supplement (doi:10.3390/antibiotics11050589), 2022-04-27
Supplement: s1 [file s1]

## Supplementary Materials

**Table S1:** Minimum inhibitory concentration of the antibiotics and potential antibiofilm tested, individually and in combination, against 4 *M. avium* and 6 *M. intracellulare* clinical isolates, and the ATCC25291 reference strain.

| Isolate                    | MIC (µg/mL) |   |   |   |     |          |     |          |     |          |     |     |     |     |     |      |
|----------------------------|-------------|---|---|---|-----|----------|-----|----------|-----|----------|-----|-----|-----|-----|-----|------|
|                            | K           | C | E | M | C/K | ΣFIC C/K | K/M | ΣFIC K/M | C/E | ΣFIC C/E | A   | D   | I   | N   | P   | T 80 |
| <i>M. avium</i> 1          | 16          | 4 | 4 | 1 | 4   | 1.25     | 2   | 2.12     | 4   | 2        | >64 | >64 | >64 | >64 | >64 | >64  |
| <i>M. avium</i> 2          | 8           | 4 | 8 | 2 | 4   | 1.5      | 4   | 2.5      | 4   | 1.5      | >64 | >64 | >64 | >64 | >64 | >64  |
| <i>M. avium</i> 3          | 16          | 4 | 4 | 1 | 4   | 1.25     | 2   | 2.12     | 4   | 2        | >64 | >64 | >64 | >64 | >64 | >64  |
| <i>M. avium</i> 4          | 16          | 2 | 8 | 2 | 4   | 2.25     | 4   | 2.25     | 4   | 2.5      | >64 | >64 | >64 | >64 | >64 | >64  |
| MIC <sub>90</sub>          | 16          | 4 | 8 | 2 | 4   | 2.25     | 4   | 2.5      | 4   | 2.5      | >64 | >64 | >64 | >64 | >64 | >64  |
| <i>M. avium</i> ATCC25291  | 8           | 2 | 4 | 1 | 4   | 2.5      | 2   | 2.25     | 4   | 3        | >64 | >64 | >64 | >64 | >64 | >64  |
| <i>M. intracellulare</i> 1 | 8           | 2 | 4 | 2 | 4   | 2.5      | 2   | 1.25     | 4   | 3        | >64 | >64 | >64 | >64 | >64 | >64  |
| <i>M. intracellulare</i> 2 | 16          | 2 | 8 | 2 | 4   | 2.25     | 4   | 2.25     | 4   | 2.5      | >64 | >64 | >64 | >64 | >64 | >64  |
| <i>M. intracellulare</i> 3 | 8           | 1 | 4 | 1 | 2   | 2.25     | 2   | 2.25     | 2   | 2.5      | >64 | >64 | >64 | >64 | >64 | >64  |
| <i>M. intracellulare</i> 4 | 8           | 2 | 8 | 1 | 2   | 1.25     | 2   | 2.25     | 2   | 1.25     | >64 | >64 | >64 | >64 | >64 | >64  |
| <i>M. intracellulare</i> 5 | 8           | 1 | 8 | 1 | 2   | 2.25     | 1   | 1.125    | 2   | 2.25     | >64 | >64 | >64 | >64 | >64 | >64  |
| <i>M. intracellulare</i> 6 | 8           | 1 | 8 | 1 | 2   | 2.25     | 2   | 1.25     | 2   | 2.25     | >64 | >64 | >64 | >64 | >64 | >64  |
| MIC <sub>90</sub>          | 16          | 2 | 8 | 2 | 4   | 2.5      | 4   | 2.25     | 4   | 3        | >64 | >64 | >64 | >64 | >64 | >64  |

MIC: minimum inhibitory concentration; K: amikacin; C: clarithromycin; E: ethambutol; M: moxifloxacin; A: acetyl-salicylic acid; DADS:diallyl disulphide; I: ibuprofen; N: N-Acetyl-L-cysteine; P: paracetamol; T80: Tween 80.

**Table S2:** Minimum biofilm eradication concentration of antibiotics and potential antibiofilm agents tested, individually and in combination, against 4 *M. avium* and 6 *M. intracellulare* clinical isolates (I), and the ATCC25291 reference strain.

| Isolate                    | MBECs (µg/mL) |      |      |      |     |          |      |          |     |          |      |      |      |      |      |      |
|----------------------------|---------------|------|------|------|-----|----------|------|----------|-----|----------|------|------|------|------|------|------|
|                            | K             | C    | E    | M    | C/K | ΣFIC C/K | K/M  | ΣFIC K/M | C/E | ΣFIC C/E | A    | D    | I    | N    | P    | T80  |
| <i>M. avium</i> 1          | 4096          | 4096 | 4096 | 4096 | 256 | 0.125    | 128  | 0.0625   | 512 | 0.25     | 4096 | 4096 | 4096 | 4096 | 4096 | 4096 |
| <i>M. avium</i> 2          | 2048          | 2048 | 2048 | 256  | 256 | 0.25     | 128  | 0.5625   | 512 | 0.5      | 4096 | 4096 | 4096 | 4096 | 4096 | 4096 |
| <i>M. avium</i> 3          | 2048          | 2048 | 2048 | 256  | 256 | 0.25     | 256  | 1.125    | 256 | 0.25     | 4096 | 4096 | 4096 | 4096 | 4096 | 4096 |
| <i>M. avium</i> 4          | 2048          | 2048 | 2048 | 4096 | 256 | 0.25     | 256  | 0.187    | 512 | 0.50     | 4096 | 4096 | 4096 | 4096 | 4096 | 4096 |
| MBEC <sub>90</sub>         | 4096          | 4096 | 4096 | 4096 | 256 | 0.25     | 256  | 1.12     | 512 | 0.5      | 4096 | 4096 | 4096 | 4096 | 4096 | 4096 |
| <i>M. avium</i> ATCC25291  | 1024          | 512  | 2048 | 256  | 256 | 0.75     | 256  | 1.125    | 256 | 0.625    | 4096 | 4096 | 4096 | 4096 | 4096 | 4096 |
| <i>M. intracellulare</i> 1 | 4096          | 1024 | 4096 | 4096 | 512 | 0.625    | 256  | 0.125    | 128 | 0.15625  | 4096 | 4096 | 4096 | 4096 | 4096 | 4096 |
| <i>M. intracellulare</i> 2 | 4096          | 2048 | 1024 | 1024 | 256 | 0.1875   | 256  | 0.3125   | 512 | 0.75     | 4096 | 4096 | 4096 | 4096 | 4096 | 4096 |
| <i>M. intracellulare</i> 3 | 4096          | 4096 | 4096 | 4096 | 512 | 0.25     | 512  | 0.25     | 128 | 0.0625   | 4096 | 4096 | 4096 | 4096 | 4096 | 4096 |
| <i>M. intracellulare</i> 4 | 4096          | 4096 | 4096 | 4096 | 256 | 0.125    | 512  | 0.25     | 256 | 0.125    | 4096 | 4096 | 4096 | 4096 | 4096 | 4096 |
| <i>M. intracellulare</i> 5 | 4096          | 4096 | 2048 | 1024 | 128 | 0.0625   | 256  | 0.3125   | 128 | 0.09375  | 4096 | 4096 | 4096 | 4096 | 4096 | 4096 |
| <i>M. intracellulare</i> 6 | 4096          | 4096 | 2048 | 4096 | 128 | 0.0625   | 512  | 0.25     | 128 | 0.09375  | 4096 | 4096 | 4096 | 4096 | 4096 | 4096 |
| MBEC <sub>90</sub>         | 4096          | 4096 | 4096 | 4096 | 512 | 0.25     | 4096 | 2        | 512 | 0.75     | 4096 | 4096 | 4096 | 4096 | 4096 | 4096 |

MBEC: minimum biofilm eradication concentration; MBIC: minimum biofilm inhibitory concentration; K: amikacin; C: clarithromycin; E: ethambutol; M: moxifloxacin; A: acetyl-salicylic acid; D: diallyl disulphide; I: ibuprofen; N: N-Acetyl-L-cysteine; P: paracetamol; T80: Tween 80.

**Table S3:** Minimum biofilm eradication concentration of antibiotics and potential antibiofilm agents tested, individually and in combination, against 4 *M. avium* and 6 *M. intracellulare* clinical isolates (II), and the ATCC25291 reference strain.

| Isolate                    | MBEC (µg/mL) |            |       |            |       |            |       |            |       |            |         |              |
|----------------------------|--------------|------------|-------|------------|-------|------------|-------|------------|-------|------------|---------|--------------|
|                            | C/K/A        | ΣFIC C/K/A | C/K/I | ΣFIC C/K/I | C/K/P | ΣFIC C/K/P | C/K/N | ΣFIC C/K/N | C/K/D | ΣFIC C/K/D | C/K/T80 | ΣFIC C/K/T80 |
| <i>M. avium</i> 1          | 128          | 0.09375    | 128   | 0.09375    | 128   | 0.09375    | 128   | 0.09375    | 128   | 0.09375    | 256     | 0.1875       |
| <i>M. avium</i> 2          | 128          | 0.15625    | 128   | 0.15625    | 128   | 0.15625    | 256   | 0.3        | 128   | 0.15625    | 256     | 0.3          |
| <i>M. avium</i> 3          | 128          | 0.15625    | 128   | 0.15625    | 128   | 0.15625    | 256   | 0.3        | 128   | 0.3        | 128     | 0.15625      |
| <i>M. avium</i> 4          | 128          | 0.15625    | 128   | 0.15625    | 128   | 0.15625    | 256   | 0.3        | 128   | 0.3        | 128     | 0.3          |
| MBEC <sub>90</sub>         | 128          | 0.15625    | 128   | 0.15625    | 128   | 0.15625    | 256   | 0.3        | 128   | 0.3        | 256     | 0.3          |
| <i>M. avium</i> ATCC25291  | 128          | 0.40625    | 128   | 0.40625    | 128   | 0.40625    | 256   | 0.8125     | 128   | 0.40625    | 256     | 0.8125       |
| <i>M. intracellulare</i> 1 | 128          | 0.1875     | 32    | 0.046875   | 256   | 0.375      | 128   | 0.1875     | 32    | 0.046875   | 256     | 0.375        |
| <i>M. intracellulare</i> 2 | 128          | 0.125      | 128   | 0.125      | 128   | 0.125      | 128   | 0.125      | 64    | 0.0625     | 256     | 0.25         |
| <i>M. intracellulare</i> 3 | 128          | 0.09375    | 64    | 0.046875   | 128   | 0.09375    | 128   | 0.09375    | 128   | 0.09375    | 256     | 0.1875       |
| <i>M. intracellulare</i> 4 | 128          | 0.09375    | 256   | 0.1875     | 128   | 0.09375    | 128   | 0.09375    | 128   | 0.09375    | 128     | 0.09375      |
| <i>M. intracellulare</i> 5 | 128          | 0.09375    | 256   | 0.1875     | 128   | 0.09375    | 128   | 0.09375    | 128   | 0.09375    | 128     | 0.09375      |
| <i>M. intracellulare</i> 6 | 128          | 0.09375    | 256   | 0.1875     | 128   | 0.09375    | 128   | 0.09375    | 128   | 0.09375    | 128     | 0.09375      |
| MBEC <sub>90</sub>         | 128          | 0.125      | 256   | 0.1875     | 256   | 0.375      | 128   | 0.1875     | 128   | 0.09375    | 256     | 0.375        |

MBEC: minimum biofilm eradication concentration; C: clarithromycin; K: amikacin; E: ethambutol; A: acetyl-salicylic acid; I: ibuprofen; P: paracetamol; N: N-Acetyl-L-cysteine; D: diallyl disulphide; T80: Tween80.

**Table S4:** Minimum biofilm inhibitory concentration of the antibiotics and potential antibiofilm agents tested, individually and in combination, against 4 *M. avium* and 6 *M. intracellulare* clinical isolates (I), and the ATCC25291 reference strain.

| Isolate                    | MBICs (µg/mL) |      |      |      |      |          |      |          |      |          |      |      |      |      |      |      |
|----------------------------|---------------|------|------|------|------|----------|------|----------|------|----------|------|------|------|------|------|------|
|                            | K             | C    | E    | M    | C/K  | ΣFIC C/K | K/M  | ΣFIC K/M | C/E  | ΣFIC C/E | A    | D    | I    | N    | P    | T80  |
| <i>M. avium</i> 1          | 2048          | 4096 | 2048 | 4096 | 256  | ND       | 2048 | ND       | 512  | ND       | 4096 | 4096 | 4096 | 4096 | 4096 | 4096 |
| <i>M. avium</i> 2          | 1024          | 128  | 1024 | 256  | 512  | ND       | 512  | ND       | 512  | ND       | 4096 | 4096 | 4096 | 4096 | 4096 | 4096 |
| <i>M. avium</i> 3          | 256           | 256  | 128  | 256  | 512  | ND       | 256  | ND       | 2048 | ND       | 4096 | 4096 | 4096 | 4096 | 4096 | 4096 |
| <i>M. avium</i> 4          | 256           | 1024 | 2048 | 2014 | 1024 | ND       | 512  | ND       | 1024 | ND       | 4096 | 4096 | 4096 | 4096 | 4096 | 4096 |
| MBIC <sub>90</sub>         | 2048          | 4096 | 2048 | 4096 | 1024 | ND       | 2048 | ND       | 2048 | ND       | 4096 | 4096 | 4096 | 4096 | 4096 | 4096 |
| <i>M. avium</i> ATCC25291  | 1024          | 256  | 2048 | 512  | 1024 | ND       | 1024 | ND       | 2048 | ND       | 4096 | 4096 | 4096 | 4096 | 4096 | 4096 |
| <i>M. intracellulare</i> 1 | 4096          | 1024 | 2048 | 512  | 512  | ND       | 2048 | ND       | 512  | ND       | 4096 | 4096 | 4096 | 4096 | 4096 | 4096 |
| <i>M. intracellulare</i> 2 | 256           | 256  | 512  | 512  | 512  | ND       | 256  | ND       | 512  | ND       | 4096 | 4096 | 4096 | 4096 | 4096 | 4096 |
| <i>M. intracellulare</i> 3 | 2048          | 256  | 256  | 1024 | 512  | ND       | 256  | ND       | 128  | ND       | 4096 | 4096 | 4096 | 4096 | 4096 | 4096 |
| <i>M. intracellulare</i> 4 | 2048          | 256  | 512  | 256  | 256  | ND       | 512  | ND       | 256  | ND       | 4096 | 4096 | 4096 | 4096 | 4096 | 4096 |
| <i>M. intracellulare</i> 5 | 512           | 4096 | 512  | 512  | 512  | ND       | 1024 | ND       | 512  | ND       | 4096 | 4096 | 4096 | 4096 | 4096 | 4096 |
| <i>M. intracellulare</i> 6 | 2048          | 512  | 512  | 512  | 512  | ND       | 512  | ND       | 512  | ND       | 4096 | 4096 | 4096 | 4096 | 4096 | 4096 |
| MBIC <sub>90</sub>         | 4096          | 4096 | 2048 | 1024 | 512  | ND       | 2048 | ND       | 512  | ND       | 4096 | 4096 | 4096 | 4096 | 4096 | 4096 |

MBIC: minimum biofilm inhibitory concentration; K: amikacin; C: clarithromycin; E: ethambutol; A: acetyl-salicylic acid; D: diallyl disulphide; I: ibuprofen; N: N-Acetyl-L-cysteine; P: paracetamol; T80: Tween80.

**Table S5:** Minimum biofilm inhibitory concentration of the antibiotics and potential antibiofilm agents tested, individually and in combination, against 4 *M. avium* and 6 *M. intracellulare* clinical isolates (II), and the ATCC25291 reference strain.

| Isolate                      | MBIC (µg/mL) |               |       |               |       |               |       |               |       |               |         |                 |
|------------------------------|--------------|---------------|-------|---------------|-------|---------------|-------|---------------|-------|---------------|---------|-----------------|
|                              | C/K/A        | ΣFIC<br>C/K/A | C/K/I | ΣFIC<br>C/K/I | C/K/P | ΣFIC<br>C/K/P | C/K/N | ΣFIC<br>C/K/N | C/K/D | ΣFIC<br>C/K/D | C/K/T80 | ΣFIC<br>C/K/T80 |
| <i>M. avium</i> 1            | 28           | ND            | 128   | ND            | 128   | ND            | 128   | ND            | 128   | ND            | 256     | ND              |
| <i>M. avium</i> 2            | 28           | ND            | 128   | ND            | 128   | ND            | 256   | ND            | 128   | ND            | 256     | ND              |
| <i>M. avium</i> 3            | 128          | ND            | 128   | ND            | 128   | ND            | 256   | ND            | 128   | ND            | 128     | ND              |
| <i>M. avium</i> 4            | 128          | ND            | 128   | ND            | 128   | ND            | 256   | ND            | 128   | ND            | 128     | ND              |
| MBIC <sub>90</sub>           | 128          | ND            | 128   | ND            | 128   | ND            | 256   | ND            | 128   | ND            | 256     | ND              |
| <i>M. avium</i><br>ATCC25291 | 128          | ND            | 128   | ND            | 128   | ND            | 256   | ND            | 128   | ND            | 512     | ND              |
| <i>M. intracellulare</i> 1   | 128          | ND            | 128   | ND            | 256   | ND            | 64    | ND            | 64    | ND            | 256     | ND              |
| <i>M. intracellulare</i> 2   | 128          | ND            | 128   | ND            | 128   | ND            | 128   | ND            | 64    | ND            | 256     | ND              |
| <i>M. intracellulare</i> 3   | 128          | ND            | 64    | ND            | 128   | ND            | 128   | ND            | 128   | ND            | 256     | ND              |
| <i>M. intracellulare</i> 4   | 128          | ND            | 256   | ND            | 128   | ND            | 64    | ND            | 128   | ND            | 128     | ND              |
| <i>M. intracellulare</i> 5   | 128          | ND            | 256   | ND            | 128   | ND            | 128   | ND            | 128   | ND            | 128     | ND              |
| <i>M. intracellulare</i> 6   | 128          | ND            | 256   | ND            | 128   | ND            | 128   | ND            | 128   | ND            | 128     | ND              |
| MBIC <sub>90</sub>           | 128          | ND            | 256   | ND            | 256   | ND            | 128   | ND            | 128   | ND            | 256     | ND              |

MBIC: minimum biofilm inhibitory concentration; C: clarithromycin; K: amikacin; E: ethambutol; A: acetyl-salicylic acid; I: ibuprofen; P: paracetamol; N: N-Acetyl-L-cysteine; D: diallyl disulphide; T80: Tween80.

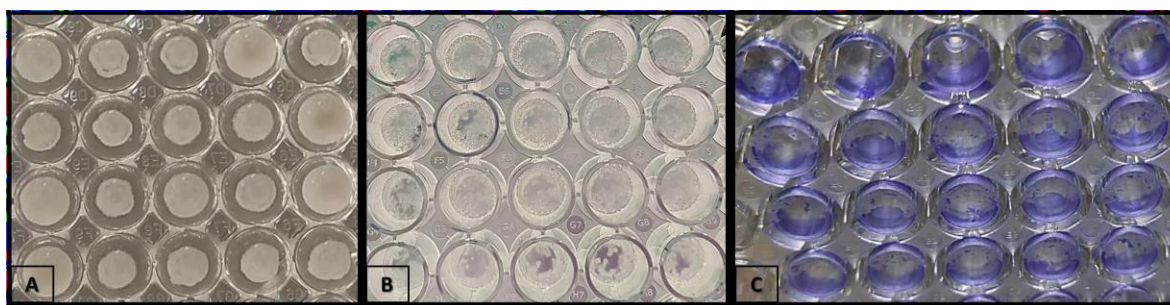

**Figure S1:** Biofilm formation and the Crystal Violet method used to determine the quantification of the biofilm by measuring the optical density (OD) of the dyed biofilm. A) Biofilm formation at 37 °C for 4 weeks in Middlebrook 7H9 liquid media; B) Fixed biofilm at the bottom of the wells after being washed with PBS and dried at 60 °C; C) Crystal violet dyed, washed and dried biofilm to be read the OD with acetic acid solution.
